# Supplementary material
Source: publisher figshare collection journal article supplement (https://karger.figshare.com/ndownloader/files/38287881)
Supplement: Supplementary file 1 [file 38287881]

**Table S1**. Description of selected and genotyped single nucleotide polymorphisms.

| Chr | SNP ID | Gene ID | Minor Allele | MAF | Risk allele | HWE p-value | Functional Consequence |
| --- | --- | --- | --- | --- | --- | --- | --- |
| 3 | rs1801282 | PPARG | G | 0.11 | C | 0.19 | Missense, Pro12Ala |
| 6 | rs1044498 | ENPP1 | C | 0.14 | C | 0.90 | Missense, Lys121Gln |
| 20 | rs2295490 | TRIB3 | G | 0.15 | G | 0.12 | Missense, Gln84Arg |
| 2 | rs1801278 | IRS1 | T | 0.07 | T | 0.11 | Missense, Gly972Arg |
| 12 | rs35767 | IGF1 | A | 0.16 | A | 0.17 | Missense, Val9Gly |
| 2 | rs780094 | GCKR | C | 0.42 | T | 0.99 | Intron Variant |
| *Abbreviations*: HWE, Hardy–Weinberg Equilibrium; Chr, chromosome position; SNP, single nucleotide polymorphism; MAF, minor allele frequency; ID, identification. | | | | | | | |
